# Supplementary material for: Performance of oral HPV DNA, oral HPV mRNA and circulating tumor HPV DNA in the detection of HPV‐related oropharyngeal cancer and cancer of unknown primary
Source: PubMed Central journal article supplement (PMC9290341; doi:10.1002/ijc.33798), 2021-09-20
Supplement: IJC-150-174-s001.pdf [file IJC-150-174-s001.pdf]

# **Performance of Oral HPV DNA, Oral HPV mRNA, and Circulating Tumor HPV DNA in the Detection of HPV-Related Oropharyngeal Cancer and Cancer of Unknown Primary**

Hidenori Tanaka, Motoyuki Suzuki, Norihiko Takemoto, Takahito Fukusumi, Hiroataka Eguchi, Erina Takai, Haruka Kanai, Mitsuaki Tatsumi, Masafumi Horie, Yukinori Takenaka, Shinichi Yachida, and Hidenori Inohara

## **Supplementary material**

### **Table of contents:**

**Supplementary Table S1.** Baseline characteristics of patients with other high-risk HPV-related OPSCC or SCCUP.

**Supplementary Table S2.** Baseline characteristics of patients with HPV-unrelated OPSCC or SCCUP.

**Supplementary Table S3.** Concordance in genotype between tumor HPV and oral HPV in patients with HPV-related OPSCC or SCCUP.

**Supplementary Table S4.** Oral HPV test positivity according to characteristics in patients with any high-risk HPV-related OPSCC.

**Supplementary Figure S1.** Flowchart of the study population and sample collection for patients with OPSCC and patients with SCCUP.

**Supplementary Figure S2.** Two-channel analysis of FAM and HEX for ddPCR.

**Supplementary Figure S3.** Correlation of ctHPV16DNA levels with characteristics unrelated to the extent of disease in patients with HPV16-related tumor.

**Supplementary Table S1.** Baseline characteristics of patients with other high-risk HPV-related OPSCC or SCCUP

|                                             | Other high-risk HPV-related OPSCC | Other high-risk HPV-related SCCUP |
|---------------------------------------------|-----------------------------------|-----------------------------------|
|                                             | Oral and blood sample, N = 11     | Blood sample, N = 1               |
| <b>Sex</b>                                  |                                   |                                   |
| Male                                        | 8                                 | 1                                 |
| Female                                      | 3                                 | 0                                 |
| <b>Age</b>                                  |                                   |                                   |
| Median                                      | 75                                | 66                                |
| Range                                       | 63–90                             | -                                 |
| <b>Smoking history</b>                      |                                   |                                   |
| < 10 pack-years                             | 5                                 | 0                                 |
| ≥ 10 pack-years                             | 6                                 | 1                                 |
| <b>p16 IHC / HPV DNA status</b>             |                                   |                                   |
| p16-positive / other high-risk HPV-positive | 11                                | 1                                 |
| p16-unknown / other high-risk HPV-positive  | 0                                 | 0                                 |
| <b>Primary subsite</b>                      |                                   |                                   |
| Lateral wall                                | 7                                 | -                                 |
| Anterior wall                               | 3                                 | -                                 |
| Posterior wall                              | 1                                 | -                                 |
| Unknown                                     | -                                 | 1                                 |
| <b>T classification</b>                     |                                   |                                   |
| T0/T1/T2/T3/T4                              | -/2/5/2/2                         | 1/-/-/-                           |

**N classification\***

N0/N1/N2a/N2b/N2c/N3

2/0/2/4/2/1

0/0/0/1/0/0

**N classification†**

N0/N1/N2/N3

2/6/2/1

0/1/0/0

**M classification**

M0/M1

10/1

1/0

**Stage\***

I/II/III/IV

0/2/1/8

0/0/0/1

**Stage†**

I/II/III/IV

7/1/2/1

1/0/0/0

---

\* According to the 7<sup>th</sup> edition of UICC TNM classification system.

† According to the 8<sup>th</sup> edition of UICC TNM classification system.

Abbreviations: HPV, human papillomavirus; IHC, immunohistochemistry; OPSCC, oropharyngeal squamous cell carcinoma; SCCUP, squamous cell carcinoma of unknown primary; UICC, Union for International Cancer Control.

**Supplementary Table S2.** Baseline characteristics of patients with HPV-unrelated OPSCC or SCCUP

|                                 | HPV-unrelated OPSCC |                      | HPV-unrelated SCCUP          |
|---------------------------------|---------------------|----------------------|------------------------------|
|                                 | Oral sample, N = 18 | Blood sample, N = 21 | Oral and blood sample, N = 1 |
| <b>Sex</b>                      |                     |                      |                              |
| Male                            | 16                  | 18                   | 1                            |
| Female                          | 2                   | 3                    | 0                            |
| <b>Age</b>                      |                     |                      |                              |
| Median                          | 70                  | 70                   | 81                           |
| Range                           | 39–82               | 39–82                | -                            |
| <b>Smoking history</b>          |                     |                      |                              |
| < 10 pack-years                 | 1                   | 3                    | 0                            |
| ≥ 10 pack-years                 | 17                  | 18                   | 1                            |
| <b>p16 IHC / HPV DNA status</b> |                     |                      |                              |
| p16-positive / HPV-negative     | 6                   | 7                    | 0                            |
| p16-negative / HPV-negative     | 12                  | 14                   | 1                            |
| p16-unknown / HPV-negative      | 0                   | 0                    | 0                            |
| <b>Primary subsite</b>          |                     |                      |                              |
| Lateral wall                    | 10                  | 12                   | -                            |
| Anterior wall                   | 5                   | 6                    | -                            |
| Posterior wall                  | 2                   | 2                    | -                            |
| Superior wall                   | 1                   | 1                    | -                            |
| Unknown                         | -                   | -                    | 1                            |

**T classification**

|                |           |           |          |
|----------------|-----------|-----------|----------|
| T0/T1/T2/T3/T4 | -/2/7/4/5 | -/3/8/4/6 | 1/-/-/-/ |
|----------------|-----------|-----------|----------|

**N classification\***

|                      |             |             |             |
|----------------------|-------------|-------------|-------------|
| N0/N1/N2a/N2b/N2c/N3 | 2/3/0/7/6/0 | 4/3/0/8/6/0 | 0/0/0/0/0/1 |
|----------------------|-------------|-------------|-------------|

**M classification**

|       |      |      |     |
|-------|------|------|-----|
| M0/M1 | 18/0 | 21/0 | 1/0 |
|-------|------|------|-----|

**Stage\***

|             |          |          |         |
|-------------|----------|----------|---------|
| I/II/III/IV | 1/1/3/13 | 2/1/3/15 | 0/0/0/1 |
|-------------|----------|----------|---------|

---

\*According to the 7<sup>th</sup> edition of UICC TNM classification system.

Abbreviations: HPV, human papillomavirus; IHC, immunohistochemistry; OPSCC, oropharyngeal squamous cell carcinoma; SCCUP, squamous cell carcinoma of unknown primary; UICC, Union for International Cancer Control.

**Supplementary Table S3.** Concordance in genotype between tumor HPV and oral HPV in patients with HPV-related OPSCC or SCCUP

|                       | <b>Tumor HPV genotype</b> | <b>No. of patients</b> | <b>Oral HPV Genotype*</b>                       | <b>No. of patients</b> |
|-----------------------|---------------------------|------------------------|-------------------------------------------------|------------------------|
| <b>OPSCC (N = 50)</b> | HPV16                     | 39                     | HPV16                                           | 28                     |
|                       |                           |                        | HPV16, 59                                       | 1                      |
|                       |                           |                        | HPV16, <u>66</u>                                | 1                      |
|                       |                           |                        | HPV16, <u>82</u>                                | 1                      |
|                       |                           |                        | HPV16, <u>6</u> , <u>11</u> , 39, 59, <u>82</u> | 1                      |
|                       |                           |                        | Undetectable                                    | 7                      |
|                       | HPV18                     | 2                      | HPV18                                           | 2                      |
|                       | HPV31                     | 1                      | HPV31                                           | 1                      |
|                       | HPV33                     | 1                      | HPV33                                           | 1                      |
|                       | HPV35                     | 3                      | HPV35                                           | 3                      |
|                       | HPV56                     | 1                      | Undetectable                                    | 1                      |
|                       | HPV58                     | 1                      | HPV58                                           | 1                      |
| HPV69 <sup>†</sup>    | 2                         | HPV <u>71</u>          | 1                                               |                        |
|                       |                           | Undetectable           | 1                                               |                        |
| <b>SCCUP (N = 5)</b>  | HPV16                     | 5                      | HPV16                                           | 1                      |
|                       |                           |                        | Undetectable                                    | 4                      |

\* Low-risk HPV genotypes are underlined.

† HPV69 is not covered by GENOSERCH HPV31 and this is undetectable as oral HPV.

Abbreviation: HPV, human papillomavirus; OPSCC, oropharyngeal squamous cell carcinoma; SCCUP, squamous cell carcinoma of unknown primary.

**Supplementary Table S4.** Oral HPV test positivity according to characteristics in patients with any high-risk HPV-related OPSCC

| Characteristics               | Level               | No. | Oral HPV DNA                  |                |                               | Oral HPV mRNA  |                |       |
|-------------------------------|---------------------|-----|-------------------------------|----------------|-------------------------------|----------------|----------------|-------|
|                               |                     |     | No. of positive<br>(%, 95%CI) | <i>P</i> value | No. of positive<br>(%, 95%CI) | <i>P</i> value |                |       |
| Age                           | < 65                | 15  | 13                            | (87%, 60–98)   | 0.70                          | 14             | (93%, 68–100)  | 0.25  |
|                               | ≥ 65                | 35  | 27                            | (77%, 60–90)   |                               | 27             | (77%, 60–90)   |       |
| Sex                           | Male                | 38  | 30                            | (79%, 63–90)   | 1.00                          | 31             | (82%, 66–92)   | 1.00  |
|                               | Female              | 12  | 10                            | (83%, 52–98)   |                               | 10             | (83%, 52–98)   |       |
| Pack-years of smoking         | < 10                | 18  | 16                            | (89%, 65–99)   | 0.29                          | 16             | (89%, 65–99)   | 0.46  |
|                               | ≥ 10                | 32  | 24                            | (75%, 57–89)   |                               | 25             | (78%, 60–91)   |       |
| HPV DNA                       | HPV16               | 39  | 32                            | (82%, 66–92)   | 0.67                          | 33             | (85%, 69–94)   | 0.39  |
|                               | Other high-risk HPV | 11  | 8                             | (73%, 39–94)   |                               | 8              | (73%, 39–94)   |       |
| Primary site                  | Lateral wall        | 38  | 31                            | (82%, 66–92)   | 0.41*                         | 32             | (84%, 69–94)   | 0.37* |
|                               | Anterior wall       | 10  | 7                             | (70%, 35–93)   |                               | 7              | (70%, 35–93)   |       |
|                               | Posterior wall      | 2   | 2                             | (100%, 16–100) |                               | 2              | (100%, 16–100) |       |
| T classification              | 1, 2                | 37  | 29                            | (78%, 62–90)   | 1.00                          | 29             | (78%, 62–90)   | 0.41  |
|                               | 3, 4                | 13  | 11                            | (85%, 55–98)   |                               | 12             | (92%, 64–100)  |       |
| N classification <sup>†</sup> | 0, 1, 2a            | 22  | 20                            | (91%, 71–99)   | 0.15                          | 20             | (91%, 71–99)   | 0.27  |
|                               | 2b, 2c, 3           | 28  | 20                            | (71%, 51–87)   |                               | 21             | (75%, 55–89)   |       |
| N classification <sup>‡</sup> | 0, 1                | 39  | 32                            | (82%, 66–92)   | 0.67                          | 32             | (82%, 66–92)   | 1.00  |
|                               | 2, 3                | 11  | 8                             | (73%, 39–94)   |                               | 9              | (82%, 48–98)   |       |
| Stage <sup>†</sup>            | I, II,              | 7   | 6                             | (86%, 42–100)  | 1.00                          | 6              | (86%, 42–100)  | 1.00  |

|                    |         |    |    |              |      |    |               |      |
|--------------------|---------|----|----|--------------|------|----|---------------|------|
| Stage <sup>‡</sup> | III, IV | 43 | 34 | (79%, 64–90) | 1.00 | 35 | (81%, 67–92)  | 0.67 |
|                    | I, II   | 40 | 32 | (80%, 64–91) |      | 32 | (80%, 64–91)  |      |
|                    | III, IV | 10 | 8  | (80%, 44–97) |      | 9  | (90%, 56–100) |      |

Statistical analyses were made using Fisher's exact test.

Abbreviations: CI, confidence interval; HPV, human papillomavirus; MTV, metabolic tumor volume; OPSCC, oropharyngeal squamous cell carcinoma; UICC, Union for International Cancer Control.

\* Difference was estimated between lateral wall and anterior wall.

† According to the 7<sup>th</sup> edition of UICC TNM classification system.

‡ According to the 8<sup>th</sup> edition of UICC TNM classification system.



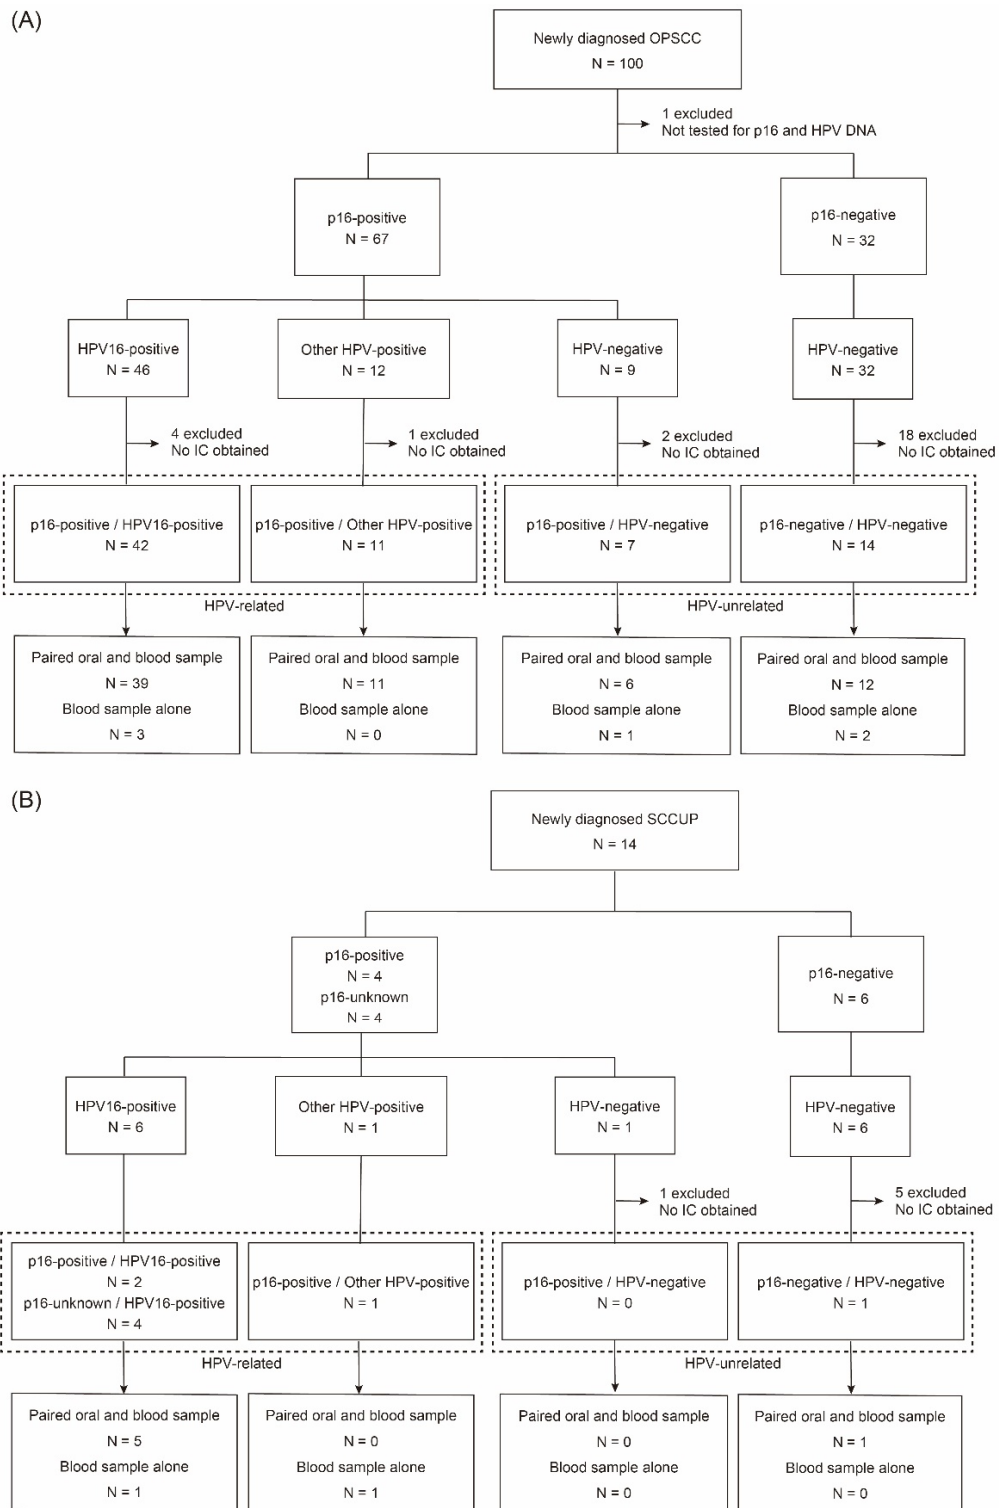

**Supplementary Figure S1. Flowchart of the study population and sample collection for patients with OPSCC (A) and patients with SCCUP (B).** HPV, human papillomavirus; HR, high-risk; IC, informed consent; OPSCC, oropharyngeal squamous cell carcinoma; SCCUP, squamous cell carcinoma of unknown primary.

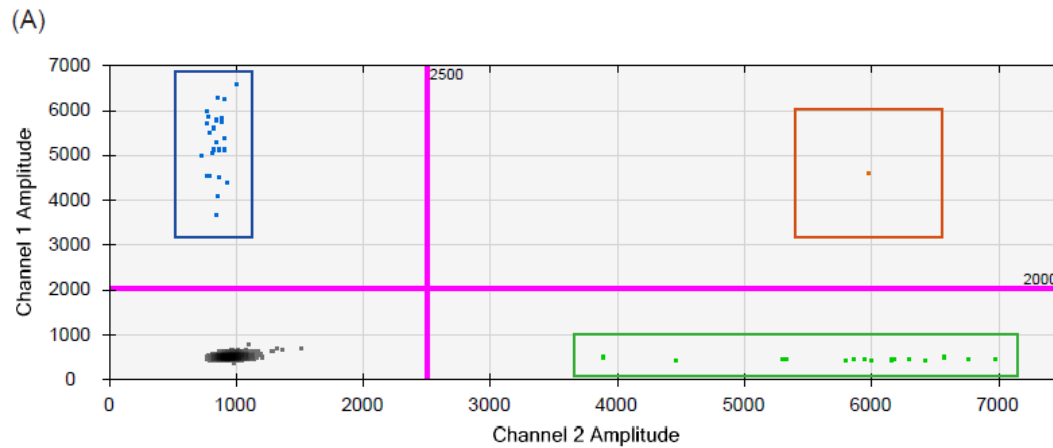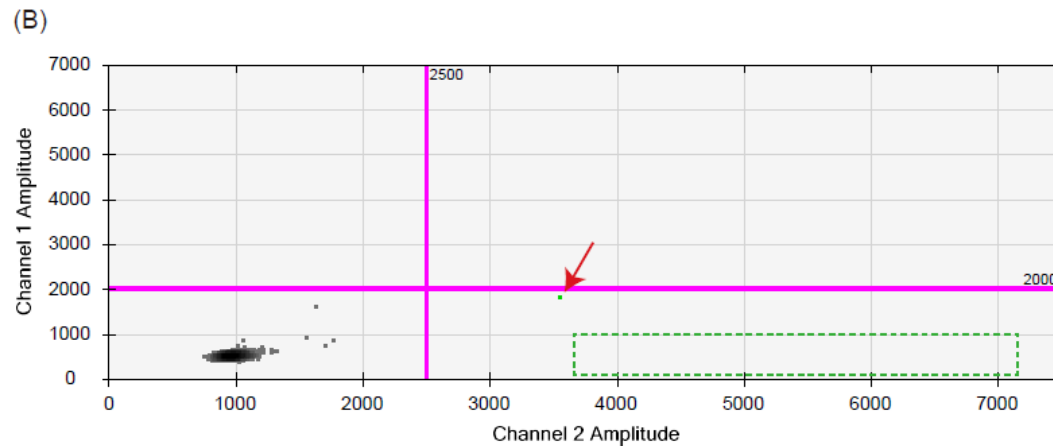

**Supplementary Figure S2. Two-channel**

**analysis of FAM and HEX for ddPCR.**

The absorbance values of the droplets are shown for (A) a representative patient with a HV16-related tumor in whom ctHPV16DNA was detectable and for (B) a patient with a HPV16-unrelated tumor in whom ctHPV16DNA was detectable. The horizontal and vertical axes represent the absorbance of HEX-labeled E6 and FAM-labeled E7, respectively.

In patient (A), E6- and E7-positive droplets are enclosed in a green and blue solid frame, respectively. Droplets that are both E6- and E7-positive are enclosed in an orange solid frame. In patient (B), neither E6- nor E7-positive droplets were observed, except for one droplet that has been indicated by using an arrow. This droplet shows the absorbance of HEX-labeled E6 exceeding the threshold; however, it is localized differently from E6-positive droplets that are

observed in patient (A), demonstrated in a green-dotted frame. It is suggested that this droplet is formed by non-specific amplification; thus, ctHPV16DNA detection is a false-positive result. ctHPV16DNA, circulating tumor HPV16 DNA; ddPCR, droplet digital PCR; FAM, 6-carboxyfluorescein; HEX, 6-carboxy-2,4,4,5,7,7-hexachlorofluorescein; HPV, human papillomavirus.

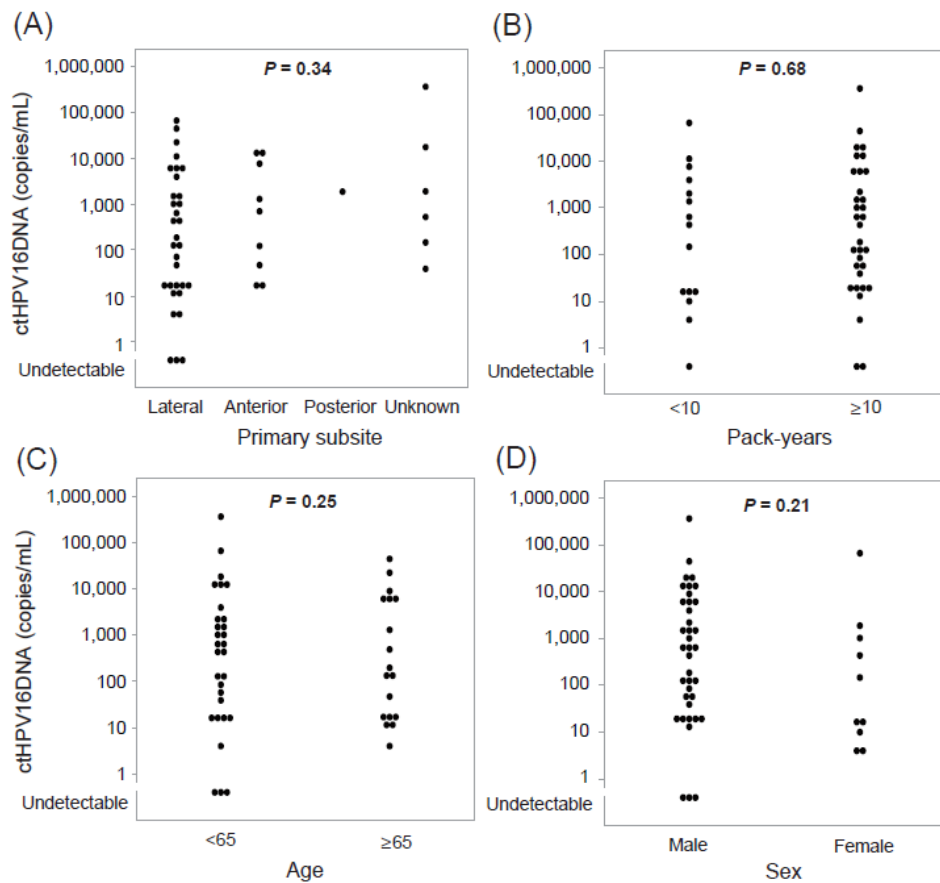

**Supplementary Figure S3. Correlation of ctHPV16DNA levels with characteristics unrelated to the extent of disease in patients with HPV16-related tumors.** The correlation of ctHPV16 DNA levels with (A) primary subsite was examined, using Kruskal-Wallis test, while the correlations of ctHPV16DNA levels with (B) smoking history (pack-years), (C) age, and (D) sex were examined, using exact Wilcoxon rank-sum test. ctHPV16DNA, circulating tumor HPV16 DNA; HPV, human papillomavirus.
